# Supplementary material
Source: publisher site journal article supplement (https://www.dovepress.com/article/501642)
Supplement: Supplementary file 1 [file get_supplementary_file.php]

**SUPPLEMENTARY INFORMATION**

**Electroacupuncture alleviates neuropathic pain and negative emotion in mice by regulating gut microbiota**

Chenchen Feng, Haotian Pan, Yanan Zhang, Zi Ye, Yiren Zhou, Hong Zou, Ke Wang


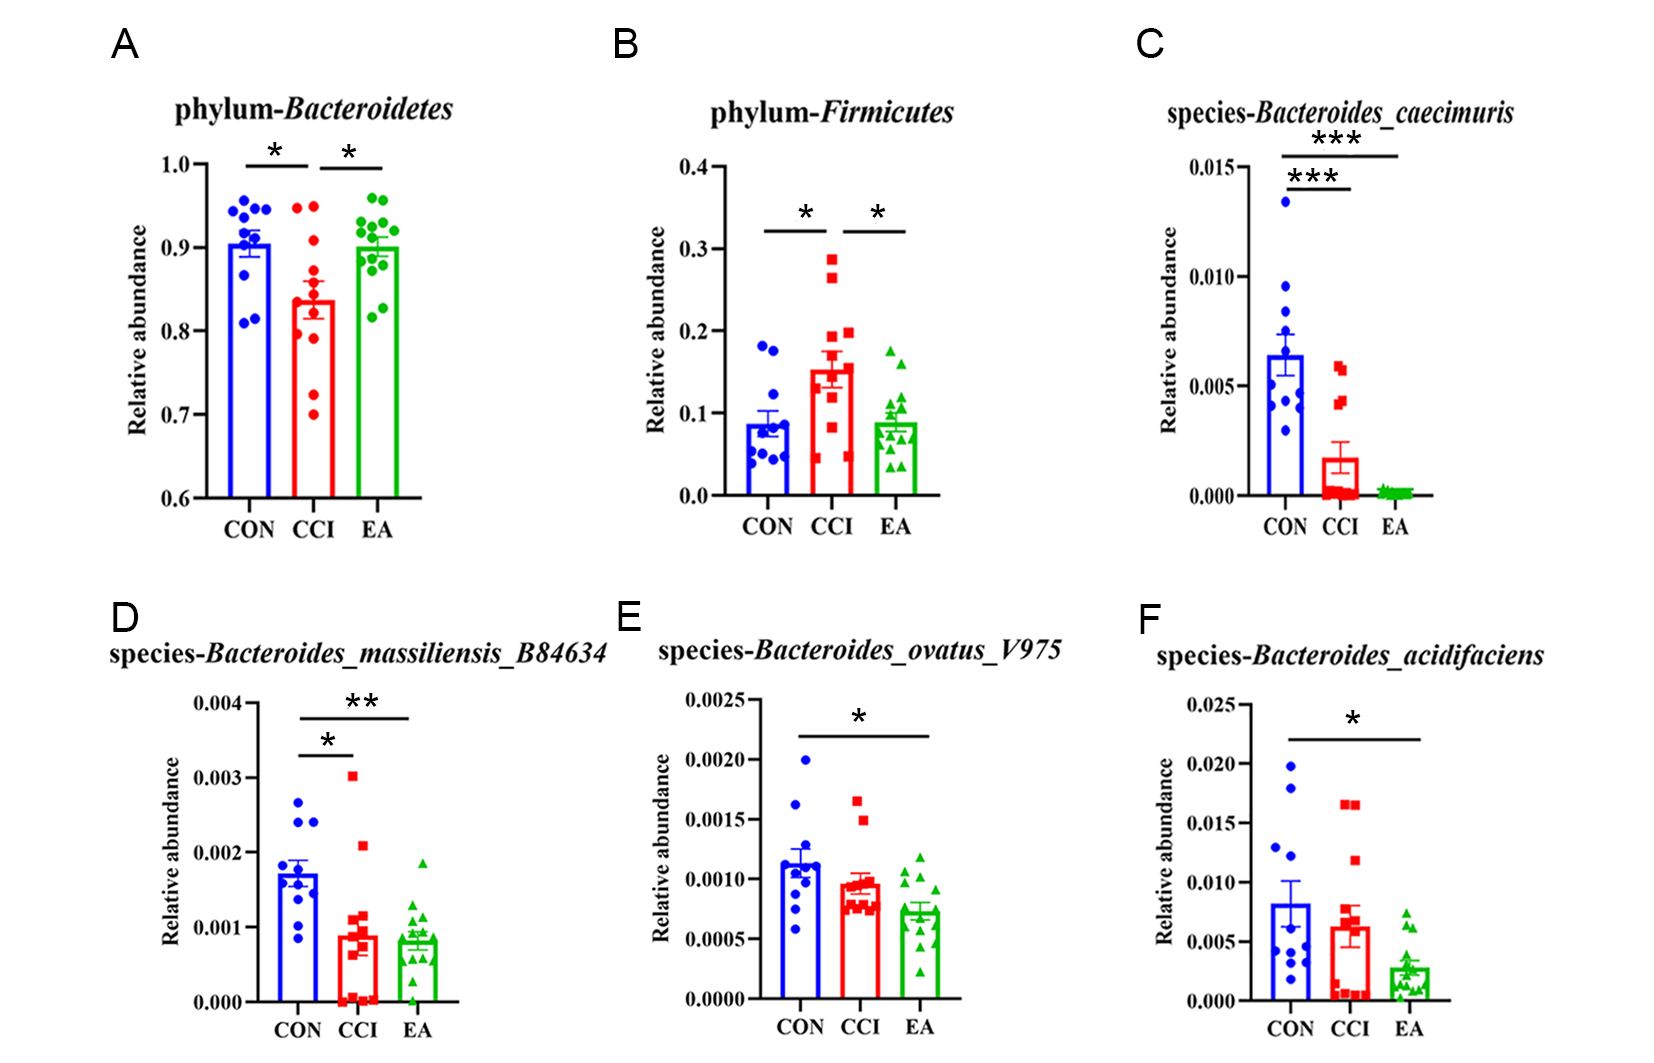


**Supplementary Figure 1.** (**A-B**) Phylum-level differences in relative abundance of *Bacteroidetes* and *Firmicutes*. (**C-F**) Species -level differences in relative abundance of *Bacteroides_acidifaciens, Bacteroides_caecimuris, Bacteroides_massiliesis_B84634, Bacteroides_ovatus_V975.* Data are mean ± standard error of the mean.

Notes: **P* < 0.05, ***P* < 0.01, ****P* < 0.001.
